# Supplementary material
Source: Springer Nature journal article supplement (https://www.springermedizin.de/resource/supplementary/12890_2009_156_MOESM1_ESM.pdf/9506104)
Supplement: MOESM1 [file 9506104]

# CAPTION PROJECT

## Community-Acquired Pneumonia: Towards Improving Outcomes Nationally

### DATA COLLECTION LOG (1<sup>st</sup> AUDIT cycle)

This log summarises the CAPTION data collection process and any issues encountered. Please complete after the review of patient records and return to your State Project Officer. Please remember, your responses will be kept strictly confidential. We appreciate your open and honest feedback

Hospital ID    — — —

Data collection start date:       — — / — — / — —

Data collection end date:       — — / — — / — —

Name of person doing data collection (optional) \_\_\_\_\_

Profession of person(s) doing data collection   \_\_\_\_\_

Total number of records reviewed   — — —   Number of records discarded       — — —  
 How was data collection carried out? (please circle)

*From paper then entry into Audit Maker*                      *Directly to Audit Maker*                      *Combination of both*

Average time taken per record (mins)       — — —

Please record any particular problems in reviewing records (e.g. access to records/legibility/inadequate information recorded etc.)

---



---

Please rate (by circling) on the following 5-point scale how easy Audit Maker was to use, where 1 equals extremely easy and 5 equals extremely difficult:

|                           |   |   |   |                                |
|---------------------------|---|---|---|--------------------------------|
| 1                         | 2 | 3 | 4 | 5                              |
| <i>Extremely<br/>easy</i> |   |   |   | <i>Extremely<br/>difficult</i> |

Please record any particular problems or comments related to either the data collection process and/or using Audit Maker (in particular any problems with data entry and/or generating the feedback report):

---



---

Thank you for your feedback.  
 Please return your completed log to your State project officer.
